# Supplementary material
Source: Royal Society of Chemistry journal article supplement (doi:10.1039/d6dt00434b)
Supplement: d6dt00434b1.pdf [file d6dt00434b1.pdf]

Data associated with this paper have been made available at the RepOD repository, doi: 10.18150/PUHR5I
